# Supplementary material for: TEOSINTE BRANCHED1 regulates height and stem internode length in bread wheat
Source: PubMed Central journal article supplement (PMC7410180; doi:10.1093/jxb/eraa252), 2020-05-25
Supplement: eraa252_suppl_supplementary_figures_s1-s2_tables-s1-s3.pdf [file eraa252_suppl_supplementary_figures_s1-s2_tables-s1-s3.pdf]

## Supplementary Data

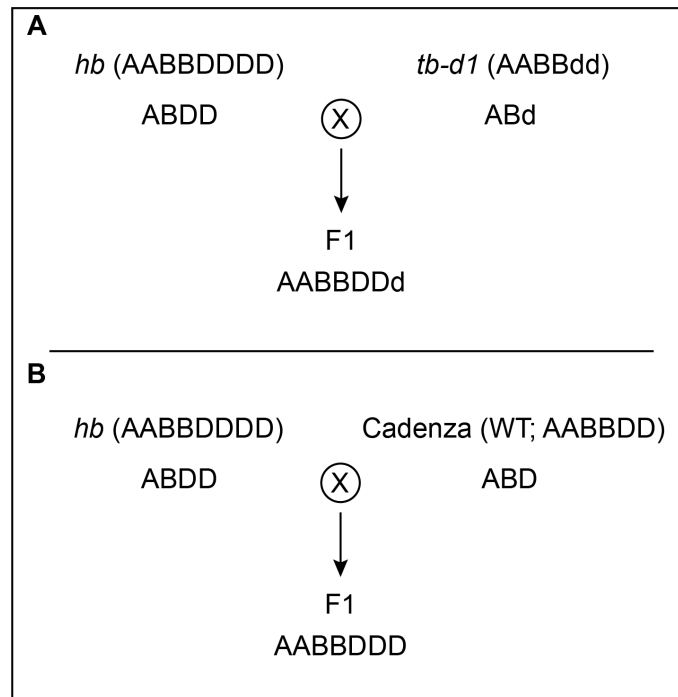

**Supplementary Figure S1. Schematic of the *hb* × *tb-d1* cross, and the control *hb* × Cadenza cross.** Schematic diagrams showing the crossing strategy of the *hb* line with either **(A)** *tb-d1* stop codon mutant (*Cad1721*) or **(B)** wild-type (Cadenza). A, B and D refer to *TB-A1*, *TB-B1* and *TB-D1* respectively, with ‘d’ referring to the nonsense allele of *TB-D1*. The diploid genotype is shown in brackets, and the gamete genotype is shown below. The F1 genotype is shown for the respective crosses.

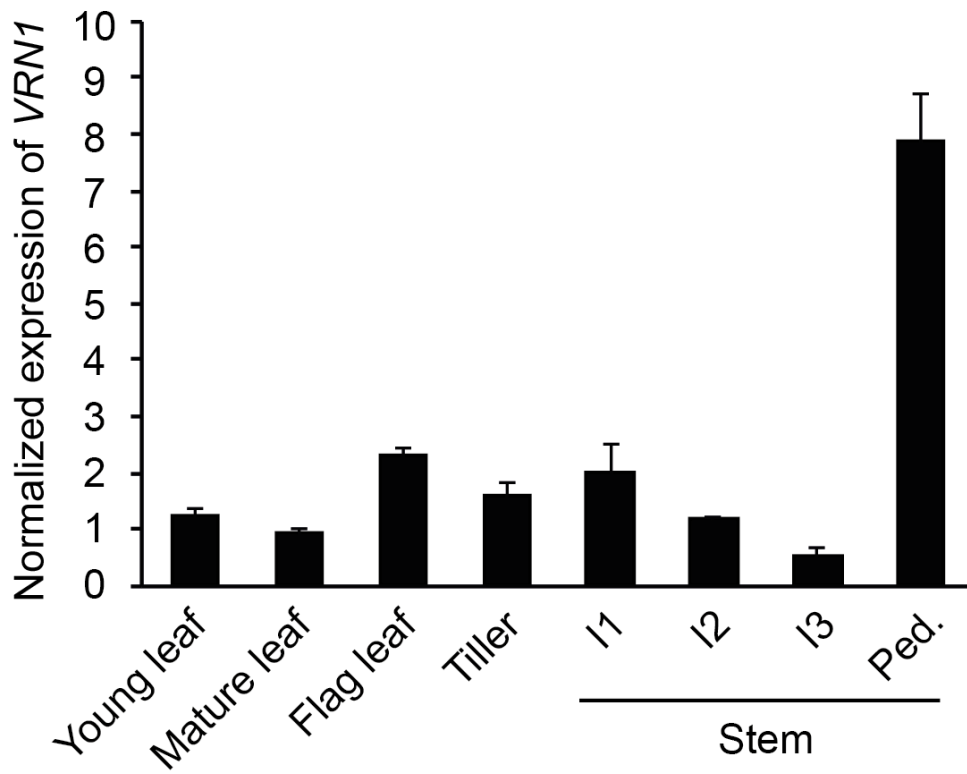

**Supplementary Figure S2. *VRN1* tissue specific expression analysis.**

Transcript analysis of *VRN1* in leaf, tiller and stem tissue. I1, internode 1; I2, internode 2; I3, internode 3; Ped., peduncle. Values are mean  $\pm$  s.e.m of 4 biological replicates.

**Supplementary Table S1. Oligonucleotide sequences used in qRT-PCR assays.**

| Gene                         | Gene ID            | Forward (sense) sequence | Reverse (anti-sense) sequence |
|------------------------------|--------------------|--------------------------|-------------------------------|
| <i>TB-B1</i>                 | TraesCS4B02G042700 | ACCCGCCAAACCAAAGC        | CATCCGGTTCTTTTCCCTAGT         |
| <i>TB-D1</i>                 | TraesCS4D02G040100 | CACCCGCCAATCCAAAAC       | ATCCGGTTCTTTTCCCTCGT          |
| <i>Traes_6DS_BE8B5E56D.1</i> | TraesCS6D02G145100 | CATGCTCTGGGATTTATCCAT    | CTGGATCATTTCGGGTGC            |
| <i>TaRPA-15</i>              |                    | GCACACGTGCTTTGCAGATAAG   | GCCCTCAAGCTCAACCATAACT        |

**Supplementary Table S2. Oligonucleotide sequences used in KASP marker assays.**

| Gene          | WT allele oligonucleotide (FAM)            | Alternate allele oligonucleotide (HEX)     | Common allele        | Source               |
|---------------|--------------------------------------------|--------------------------------------------|----------------------|----------------------|
| <i>TB-B1</i>  | GAAGGTGACCAAGTTCATGCT-TTCCTTTGCGGCTTTGGT   | GAAGGTCGGAGTCAACGGATT-TTCCTTTGCGGCTTTGGA   | CGGCGAGGGGAAGAAGCA   | Dixon et al. 2018    |
| <i>Rht-B1</i> | GAAGGTGACCAAGTTCATGCT-CCCATGGCCATCTCCAGCTG | GAAGGTCGGAGTCAACGGATT-CCCATGGCCATCTCTAGCTA | TCGGGTACAAGGTGCGGGCG | Simon Griffiths, JIC |
| <i>Rht-D1</i> | GAAGGTGACCAAGTTCATGCT-CGTGGCGCAGAAGCTGG    | GAAGGTCGGAGTCAACGGATT-CGTGGCGCAGAAGCTGT    | TCCCCATGGCCATCTCG    | Simon Griffiths, JIC |

**Supplementary Table S3. *TB-B1* alleles of 8-way MAGIC lines investigated in this study.**

| <b>MEL ID</b> | <b>TB-B1 genotype</b> |
|---------------|-----------------------|
| 002-1         | <i>TB-B1b</i>         |
| 002-3         | <i>TB-B1b</i>         |
| 002-5A        | <i>TB-B1a</i>         |
| 002-8         | <i>TB-B1a</i>         |
| 004-2         | <i>TB-B1a</i>         |
| 004-3         | <i>TB-B1a</i>         |
| 005-7         | <i>TB-B1a</i>         |
| 005-8A        | <i>TB-B1b</i>         |
| 006-3         | <i>TB-B1b</i>         |
| 008-1         | <i>TB-B1a</i>         |
| 008-2         | <i>TB-B1a</i>         |
| 008-3         | <i>TB-B1a</i>         |
| 010-1b        | <i>TB-B1a</i>         |
| 010-3         | <i>TB-B1a</i>         |
| 010-5         | <i>TB-B1a</i>         |
| 011-1b        | <i>TB-B1b</i>         |
| 011-2a        | <i>TB-B1a</i>         |
| 011-3         | <i>TB-B1b</i>         |
| 011-4         | <i>TB-B1a</i>         |
| 012-4         | <i>TB-B1a</i>         |
| 014-7         | <i>TB-B1a</i>         |
| 015-3         | <i>TB-B1b</i>         |
| 015-8         | <i>TB-B1a</i>         |
| 016-4         | <i>TB-B1b</i>         |
| 017-4         | <i>TB-B1b</i>         |
| 017-7         | <i>TB-B1b</i>         |
| 020-3         | <i>TB-B1a</i>         |
| 020-7         | <i>TB-B1a</i>         |
| 023-5         | <i>TB-B1a</i>         |
| 024-2         | <i>TB-B1a</i>         |
| 024-5         | <i>TB-B1a</i>         |
| 025-1d        | <i>TB-B1a</i>         |
| 025-1e        | <i>TB-B1a</i>         |
| 025-1f        | <i>TB-B1a</i>         |
| 026-1b        | <i>TB-B1b</i>         |
| 029-2b        | <i>TB-B1b</i>         |
| 032-2         | <i>TB-B1b</i>         |
| 033-5         | <i>TB-B1a</i>         |
| 033-7         | <i>TB-B1a</i>         |
| 034-7         | <i>TB-B1a</i>         |
| 035-1         | <i>TB-B1a</i>         |
| 036-7         | <i>TB-B1a</i>         |
| 036-8         | <i>TB-B1b</i>         |
| 043-1         | <i>TB-B1b</i>         |
| 043-2         | <i>TB-B1a</i>         |
| 043-3         | <i>TB-B1a</i>         |
| 043-5         | <i>TB-B1b</i>         |
| 043-6         | <i>TB-B1b</i>         |

|        |               |
|--------|---------------|
| 044a-1 | <i>TB-B1b</i> |
| 045-1b | <i>TB-B1b</i> |
| 046-1  | <i>TB-B1b</i> |
| 046-2  | <i>TB-B1b</i> |
| 049-2  | <i>TB-B1a</i> |
| 052-7  | <i>TB-B1a</i> |
| 056-1  | <i>TB-B1b</i> |
| 056-4  | <i>TB-B1a</i> |
| 057-1a | <i>TB-B1a</i> |
| 059-1b | <i>TB-B1a</i> |
| 060-1b | <i>TB-B1b</i> |
| 060-3  | <i>TB-B1b</i> |
| 062-2  | <i>TB-B1a</i> |
| 062-3  | <i>TB-B1a</i> |
| 064-1b | <i>TB-B1a</i> |
| 070-1c | <i>TB-B1b</i> |
| 071-1b | <i>TB-B1b</i> |
| 072-1a | <i>TB-B1b</i> |
| 072-1c | <i>TB-B1b</i> |
| 072-1d | <i>TB-B1b</i> |
| 077-3  | <i>TB-B1a</i> |
| 083-1  | <i>TB-B1b</i> |
| 084-3  | <i>TB-B1b</i> |
| 086-3  | <i>TB-B1b</i> |
| 086-7  | <i>TB-B1b</i> |
| 088-1  | <i>TB-B1a</i> |
| 088-3  | <i>TB-B1a</i> |
| 088-6  | <i>TB-B1a</i> |
| 089-4  | <i>TB-B1a</i> |
| 090-1a | <i>TB-B1a</i> |
| 090-2c | <i>TB-B1a</i> |
| 095-1  | <i>TB-B1a</i> |
| 096-6  | <i>TB-B1a</i> |
| 097-1  | <i>TB-B1b</i> |
| 097-2  | <i>TB-B1b</i> |
| 099-4  | <i>TB-B1b</i> |
| 101-7  | <i>TB-B1a</i> |
| 103-1  | <i>TB-B1a</i> |
| 104-4  | <i>TB-B1b</i> |
| 105-1  | <i>TB-B1a</i> |
| 114-8  | <i>TB-B1b</i> |
| 119-1  | <i>TB-B1a</i> |
| 119-2  | <i>TB-B1b</i> |
| 119-4  | <i>TB-B1b</i> |
| 119-5  | <i>TB-B1b</i> |
| 120-3  | <i>TB-B1a</i> |
| 122-2b | <i>TB-B1a</i> |
| 122-4  | <i>TB-B1a</i> |
| 123-1  | <i>TB-B1a</i> |
| 126-2  | <i>TB-B1b</i> |
| 128-3  | <i>TB-B1a</i> |
| 128-4  | <i>TB-B1a</i> |

|         |               |
|---------|---------------|
| 129-3   | <i>TB-B1a</i> |
| 129-6   | <i>TB-B1a</i> |
| 130-4   | <i>TB-B1a</i> |
| 132-4   | <i>TB-B1a</i> |
| 139-6   | <i>TB-B1a</i> |
| 139-7   | <i>TB-B1a</i> |
| 140-1b  | <i>TB-B1a</i> |
| 140-3   | <i>TB-B1a</i> |
| 145-2   | <i>TB-B1a</i> |
| 146-1b  | <i>TB-B1a</i> |
| 152-2a  | <i>TB-B1b</i> |
| 154-3   | <i>TB-B1a</i> |
| 156-4   | <i>TB-B1b</i> |
| 158-4   | <i>TB-B1b</i> |
| 158-7   | <i>TB-B1b</i> |
| 159-8   | <i>TB-B1a</i> |
| 161-2   | <i>TB-B1a</i> |
| 168-1b  | <i>TB-B1b</i> |
| 170-3   | <i>TB-B1a</i> |
| 170-8   | <i>TB-B1a</i> |
| 179-2   | <i>TB-B1b</i> |
| 182-3b  | <i>TB-B1a</i> |
| 183-1   | <i>TB-B1a</i> |
| 185-2   | <i>TB-B1b</i> |
| 186-1b  | <i>TB-B1a</i> |
| 187-2a  | <i>TB-B1b</i> |
| 189-3   | <i>TB-B1a</i> |
| 190-4   | <i>TB-B1b</i> |
| 191-4   | <i>TB-B1a</i> |
| 191-6   | <i>TB-B1a</i> |
| 196-4   | <i>TB-B1b</i> |
| 198-2   | <i>TB-B1b</i> |
| 198-3   | <i>TB-B1b</i> |
| 199-3   | <i>TB-B1b</i> |
| 201-4   | <i>TB-B1b</i> |
| 201-5   | <i>TB-B1b</i> |
| 202-2   | <i>TB-B1a</i> |
| 202-4   | <i>TB-B1b</i> |
| 203-8   | <i>TB-B1b</i> |
| 204-4   | <i>TB-B1a</i> |
| 206a-1a | <i>TB-B1b</i> |
| 207-6   | <i>TB-B1a</i> |
| 207-7   | <i>TB-B1a</i> |
| 208-6   | <i>TB-B1a</i> |

---

MEL = MAGIC Elite Line from the 8-way winter wheat population, NIAB UK. MEL is the prefix for each line.
